# Supplementary material for: Sex-specific association between gut microbiome and fat distribution
Source: PubMed Central journal article supplement (PMC6546740; doi:10.1038/s41467-019-10440-5), 2019-06-03
Supplement: 41467_2019_10440_MOESM1_ESM.pdf [file 41467_2019_10440_MOESM1_ESM.pdf]

# **Sex-Specific Association Between Gut Microbiome and Fat Distribution**

Min et al.

## **Supplementary Information**

**Supplementary Table 1. Association Between Metabolic Syndrome and Regional Fat Mass**

|                      |        | BMI             |                       | Android Fat Mass |          | Gynoid Fat Mass |          | Android, Gynoid Interaction |          |
|----------------------|--------|-----------------|-----------------------|------------------|----------|-----------------|----------|-----------------------------|----------|
|                      |        | OR <sup>a</sup> | P-values <sup>b</sup> | OR               | P-values | OR              | P-values | OR                          | P-values |
| Model 1 <sup>b</sup> | Male   | 0.98            | 0.944                 | 1.54             | 0.010    | -               | -        | -                           | -        |
|                      | Female | 0.98            | 0.923                 | 1.16             | 0.187    | -               | -        | -                           | -        |
| Model 2 <sup>c</sup> | Male   | 1.98            | 0.004                 | -                | -        | 1.05            | 0.618    | -                           | -        |
|                      | Female | 1.60            | 0.004                 | -                | -        | 0.91            | 0.118    | -                           | -        |
| Model 3 <sup>d</sup> | Male   | 1.02            | 0.944                 | 1.57             | 0.009    | 0.96            | 0.699    | -                           | -        |
|                      | Female | 1.19            | 0.525                 | 1.18             | 0.91     | 0.91            | 0.111    | -                           | -        |
| Model 4 <sup>e</sup> | Male   | 1.04            | 0.90                  | 1.87             | 0.049    | 1.11            | 0.516    | 0.99                        | 0.516    |
|                      | Female | 1.24            | 0.433                 | 2.62             | 0.020    | 1.43            | 0.109    | 1.000 <sup>f</sup>          | 0.033    |

<sup>a</sup> OR refers to the odds ratio.  
<sup>b</sup> Model 1 only included android fat mass (per 100g) adjusted for age, education, and BMI.  
<sup>c</sup> Model 2 only included gynoid fat mass (per 100g) adjusted for the same covariates.  
<sup>d</sup> Model 3 included android and gynoid fat mass, adjusted for the same covariates.  
<sup>e</sup> Model 4 included android, gynoid fat mass, and their interaction term, adjusted for the same covariates.  
<sup>f</sup> The original coefficient is -2.33E-10, after exponentiation it is extremely close to 1.

**Supplementary Table 2. Results of the Correlation Tests of Waist-to-Hip Ratio and Regional Fat Distribution**

|                        |        | Correlation Coefficient             | 95% Confidence Interval | t <sup>a</sup> | df <sup>b</sup> | P-values <sup>c</sup> |
|------------------------|--------|-------------------------------------|-------------------------|----------------|-----------------|-----------------------|
|                        |        | WHR <sup>d</sup> & AFR <sup>e</sup> | Total                   | 0.66           | (0.57, 0.73)    | 12.7                  |
| Male                   | 0.50   |                                     | (0.33, 0.64)            | 5.6            | 94              | 0.000                 |
| Female                 | 0.76   |                                     | (0.65, 0.82)            | 11.9           | 114             | 0.000                 |
| WHR & GFR <sup>e</sup> | Total  | -0.82                               | (-0.86, -0.77)          | -20.9          | 210             | 0.000                 |
|                        | Male   | -0.81                               | (-0.87, -0.72)          | -13.2          | 94              | 0.000                 |
|                        | Female | -0.81                               | (-0.87, -0.74)          | -14.9          | 114             | 0.000                 |

<sup>a</sup> t refers to the t value from the Pearson's correlation test  
<sup>b</sup> df refers to the degrees of freedom of each correlation test  
<sup>c</sup> p values are from the Pearson's correlation test  
<sup>d</sup> WHR refers to the waist-to-hip ratio  
<sup>e</sup> AFR refers to the android fat ratio, GFR refers to the gynoid fat ratio

**Supplementary Table 3. Self-Reported Menopause Status and Its Association with Fat Distribution**

Among the total of 116 women that were included in the final analysis, 65 of them reported absence of menstruation, 59 were due to menopause, 1 pregnancy, 1 breast feeding, 4 hysterectomy. The rest of 51 women had normal menstruation. None of them had undergone estrogen replacement treatment. The following table summarizes the result of the univariate logistic regressions using android fat ratio and gynoid fat ratio as the independent variable and menstruation status as the outcome.

| Association Between Menopausal Status and Overall Obesity and Fat Distribution Measurements in Women (N = 110) |      |          |                   |          |                  |          |
|----------------------------------------------------------------------------------------------------------------|------|----------|-------------------|----------|------------------|----------|
|                                                                                                                | BMI  |          | Android Fat Ratio |          | Gynoid Fat Ratio |          |
|                                                                                                                | OR   | P-Values | OR                | P-Values | OR               | P-Values |
| Model 1 <sup>a</sup>                                                                                           | 0.95 | 0.82     | -                 | -        | -                | -        |
| Model 2 <sup>b</sup>                                                                                           | -    | -        | 1.47E-11          | 0.79     | -                | -        |
| Model 3 <sup>c</sup>                                                                                           | 0.97 | 0.90     | 5.7E-09           | 0.86     | -                | -        |
| Model 4 <sup>d</sup>                                                                                           | -    | -        | -                 | -        | 2.6E-02          | 0.91     |
| Model 5 <sup>e</sup>                                                                                           | 0.89 | 0.68     | -                 | -        | 5.4E-08          | 0.71     |

<sup>a</sup> Model 1 only included BMI as the independent variable, menopause status as the outcome, model adjusted for age, education.

<sup>b</sup> Model 2 only included android fat ratio as the independent variable, menopause status as the outcome, model adjusted for age, education.

<sup>c</sup> Model 3 included both BMI and android fat as the independent variables, menopause status as the outcome, adjusted for age, education.

<sup>d</sup> Model 4 only included gynoid fat ratio as the independent variable, menopause status as the outcome, adjusted for age, education.

<sup>d</sup> Model 5 included both BMI and gynoid fat ratio as the independent variable, menopause status as the outcome, adjusted for age, education.

The results indicated that there is no sufficient evidence to support the association between android fat ratio and menopausal status, gynoid fat ratio and the menopausal status.

We further compared the regional fat ratios between men and post-menopausal women. The model adjusted for age, education level, and BMI. The results are summarized as the following:

| The Comparison of Regional Fat Ratios Between Men and Post-menopausal Women |                   |          |                  |          |
|-----------------------------------------------------------------------------|-------------------|----------|------------------|----------|
|                                                                             | Android Fat Ratio |          | Gynoid Fat Ratio |          |
|                                                                             | Effect Size       | P-Values | Effect Size      | P-Values |
| Model 1 <sup>a</sup>                                                        | -0.021            | 0.000    | -                | -        |
| Model 2 <sup>b</sup>                                                        | -                 | -        | 0.011            | 0.007    |

<sup>a</sup> Model 1 tested the differences in android fat ratio, adjusted for age, education, and BMI; men as the reference level.

<sup>b</sup> Model 2 tested the differences in gynoid fat ratio, adjusted for age, education, and BMI; men as the reference level.

### Supplementary Table 4. The Correlations Between Android Fat Ratio and Total Fat Mass

To test the correlation coefficients of the android fat ratio and the total fat mass, we applied Pearson’s correlation tests in the male and female samples separately. The results are summarized in the following table.

| Results from the Pearson’s Correlation Tests |        |                         |                         |                 |      |          |
|----------------------------------------------|--------|-------------------------|-------------------------|-----------------|------|----------|
| Android Fat Ratio                            | Sex    | Correlation Coefficient | 95% Confidence Interval | t               | df   | P-values |
|                                              |        | Male                    | 0.05                    | (-0.153, 0.247) | 0.47 | 94       |
| Gynoid Fat Ratio                             | Female | 0.20                    | (0.017, 0.368)          | 2.17            | 114  | 0.032    |
|                                              | Male   | -0.61                   | (-0.72, -0.47)          | -7.5            | 94   | < 0.005  |
|                                              | Female | -0.46                   | (-0.59, -0.30)          | -5.6            | 114  | < 0.005  |

The following figure delineates the shape of the relationship between the android fat ratio and the total fat mass by sex. The shapes of the two fitted local regression smoothing lines share similarities in shape, as indicated in the table above, the correlations in both men and women are unpronounced.

Figure affiliated to Supplementary Table 4

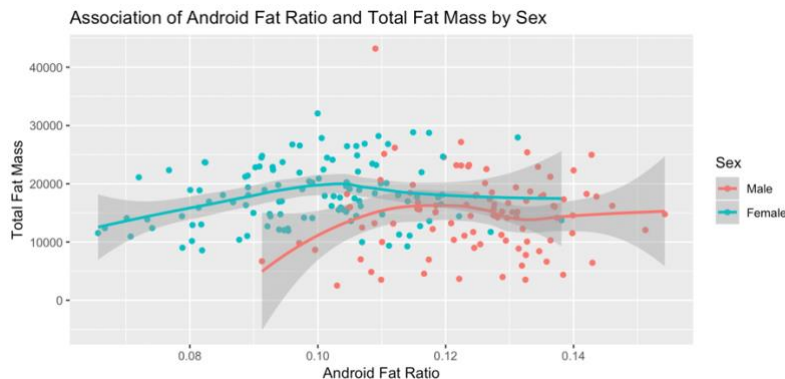

### Supplementary Table 5. Linear Association Between BMI, Total Fat Mass, and Height

We constructed a linear model in men and women with BMI as the dependent variable, total fat mass and height as the independent variables. The test result is shown in the following table:

|        |                | Coefficients | t value | P-values |
|--------|----------------|--------------|---------|----------|
| Male   | Total Fat Mass | 4.9e-04      | 22.8    | < 0.005  |
|        | Height         | 6.9e-02      | -0.05   | 0.062    |
| Female | Total Fat Mass | 5.6e-04      | 28.7    | < 0.005  |
|        | Height         | -1.3e-01     | -6.4    | < 0.005  |

The result indicates total fat mass is positively correlated with BMI in both men and women with p-values < 0.005; whereas height is negatively correlated with BMI in both men and women with p-values as 0.062 and < 0.005 respectively. The R<sup>2</sup> for the two models are 0.87 and 0.88 indicating together, total fat mass and height explain 87% of the variance of BMI in men and 88% of the variance in women.

### Supplementary Table 6. The correlation between BMI and Fat Ratios in Men and Women

We conducted four correlation tests to investigate the association between BMI and fat ratios (including android & gynoid) in men and women. The testing results are summarized in the table below:

|                   |        | Correlation Coefficient | 95% Confidence Interval | t <sup>a</sup> | df <sup>b</sup> | P-values <sup>c</sup> |
|-------------------|--------|-------------------------|-------------------------|----------------|-----------------|-----------------------|
| Android Fat Ratio | Male   | 0.07                    | (-0.13, 0.27)           | 0.7            | 94              | 0.50                  |
|                   | Female | 0.35                    | (0.18, 0.50)            | 4.0            | 114             | < 0.005               |
| Gynoid Fat Ratio  | Male   | -0.66                   | (-0.77, -0.54)          | -8.7           | 94              | < 0.005               |
|                   | Female | -0.57                   | (-0.68, -0.43)          | -7.4           | 114             | < 0.005               |

<sup>a</sup> t refers to the t value from the Pearson's correlation test  
<sup>b</sup> df refers to the degrees of freedom of each correlation test  
<sup>c</sup> p values are from the Pearson's correlation test

### Supplementary Table 7. Results of Another Linear Models for Sensitivity Analysis

| Table 7-1. Taxa Associated with Android Fat Ratio (Model Excluded Antibiotic Use)* |      |         |                     |                |                |         |
|------------------------------------------------------------------------------------|------|---------|---------------------|----------------|----------------|---------|
|                                                                                    |      | Taxa ID | Family              | Genus          | Log2FoldChange | P-adj   |
| P                                                                                  | Male | ID. 599 | Coriobacteriaceae   | Eggerthella    | 7.4            | 2.2E-03 |
|                                                                                    |      | ID. 108 | Erysipelotrichaceae | Holdemanella   | 7.4            | 2.2E-03 |
|                                                                                    |      | ID. 446 | Pasteurellaceae     | Haemophilus    | 7.5            | 2.2E-03 |
|                                                                                    |      | ID. 113 | Ruminococcaceae     | Gemmiger       | 8.3            | 5.1E-04 |
| Negative                                                                           | F    | ID. 193 | Erysipelotrichaceae | Holdemanella   | -9.5           | 7.5E-05 |
|                                                                                    | Male | ID. 225 | Bacteroidaceae      | Bacteroides    | -7.7           | 2.2E-03 |
|                                                                                    |      | ID. 215 | Prevotellaceae      | Paraprevotella | -9.8           | 6.3E-06 |
|                                                                                    |      | ID. 75  | Ruminococcaceae     | Clostridium_IV | -4.4           | 8.6E-03 |

\*Adjusted for age, BMI, smoking, alcohol use, dietary fat intake, dietary carbohydrate intake, total energy intake, and sequencing batch

| Table 7-2. Taxa Associated with Gynoid Fat Ratio (Model Excluded Antibiotic Use)* |        |         |                  |                  |                |         |
|-----------------------------------------------------------------------------------|--------|---------|------------------|------------------|----------------|---------|
| P                                                                                 | F      | Taxa ID | Family           | Genus            | Log2FoldChange | Padj    |
| Negative                                                                          | Female | ID.59   | Prevotellaceae   | Prevotella       | 10.6           | 3.9E-03 |
|                                                                                   |        | ID. 113 | Ruminococcaceae  | Gemmiger         | 8.0            | 7.2E-03 |
|                                                                                   |        | ID. 271 | Lactobacillaceae | Lactobacillus    | -6.3           | 7.3E-03 |
|                                                                                   | Male   | ID. 294 | Rikenellaceae    | Alistipes        | -10.8          | 2.4E-06 |
|                                                                                   |        | ID. 187 | Ruminococcaceae  | Ruminococcus     | -8.4           | 3.9E-03 |
|                                                                                   |        | ID. 114 | Bacteroidaceae   | Bacteroides      | -24.1          | 2.0E-21 |
|                                                                                   |        | ID. 93  | Bacteroidaceae   | Bacteroides      | -11.1          | 1.7E-03 |
|                                                                                   |        | ID. 214 | Lachnospiraceae  | Clostridium_XIVa | -5.4           | 8.7E-03 |
|                                                                                   |        | ID. 113 | Ruminococcaceae  | Gemmiger         | -10.6          | 3.0E-03 |

\*Adjusted for age, BMI, smoking, alcohol use, dietary fat intake, dietary carbohydrate intake, and sequencing batch

### Supplementary Figure 1. Sample Sequence Quality Plot

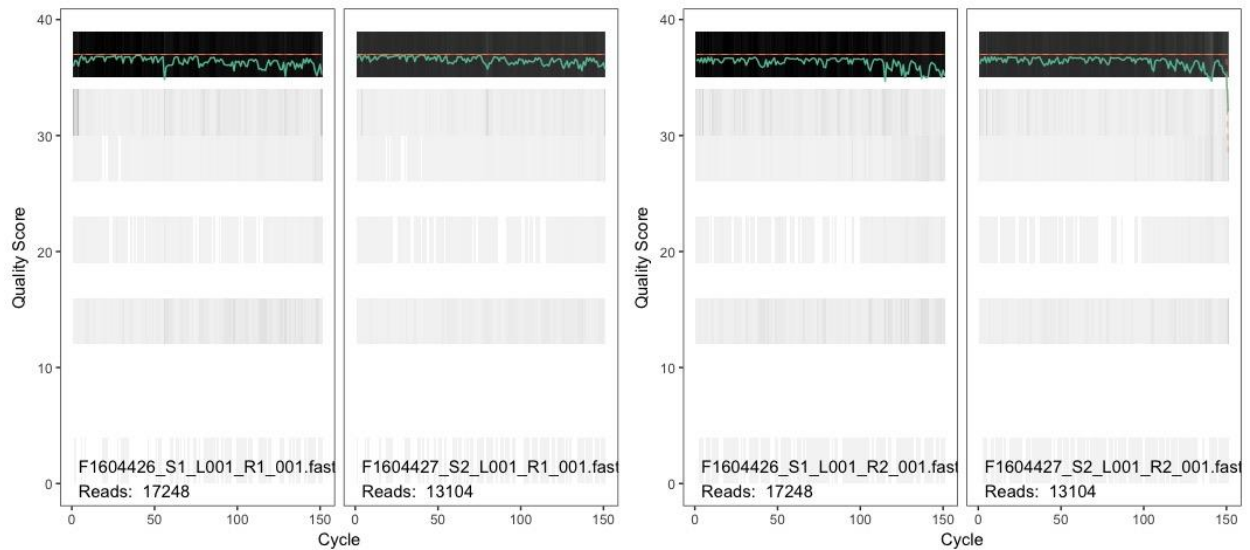

### Supplementary Figure 2. Error Rate Plot

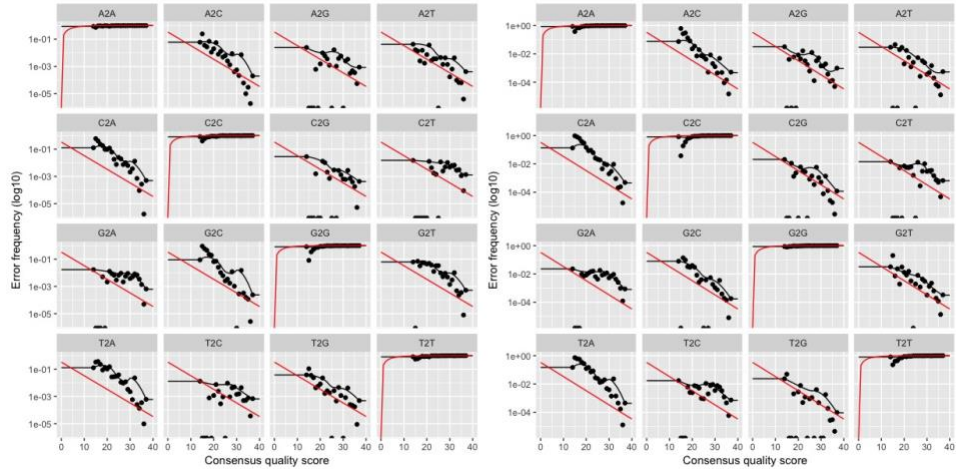

## Supplementary Methods. DNA Extraction and 16S rRNA V4 Region Sequencing

DNA was extracted using the MOBIO PowerSoil® DNA Isolation Kit 12888-100 protocol. DNA samples were stored in Tris-EDTA buffer solution at  $-80^{\circ}\text{C}$ . To enable amplification of the genes on the V4 region of the 16S rRNA and add barcode sequences, fusion primers were designed based on the universal primer set: 515F ( $5'$ -GTGYCAGCMGCCGCGGTAA- $3'$ ) and 806R ( $5'$ -GGACTACNVTGGTWTCTAAT- $3'$ ), along with barcode sequences. PCR mixtures contained  $1\ \mu\text{L}$  of each forward and reverse primer ( $10\ \mu\text{M}$ ),  $1\ \mu\text{L}$  of template DNA,  $4\ \mu\text{L}$  of dNTPs ( $2.5\ \text{mM}$ ),  $5\ \mu\text{L}$  of  $10\times$  EasyPfu Buffer,  $1\ \mu\text{L}$  of Easy Pfu DNA Polymerase ( $2.5\ \text{U}/\mu\text{L}$ ), and  $1\ \mu\text{L}$  of double distilled water in a  $50\ \mu\text{L}$  reaction volume. Thermal cycling consisted of an initial denaturation step at  $95^{\circ}\text{C}$  for 5 min, followed by 30 cycles of denaturation at  $94^{\circ}\text{C}$  for 30 s, annealing at  $60^{\circ}\text{C}$  for 30 s, and extension at  $72^{\circ}\text{C}$  for 40 s, with a final extension step at  $72^{\circ}\text{C}$  for 4 min. Ran amplicons from each sample on agarose gel. Expected band size for 515f-806r is  $\sim 300$ - $350$  bp. Quantify amplicons with Quant-iT PicoGreen dsDNA Assay Kit (ThermoFisher/Invitrogen cat. no. P11496; follow the manufacturer's instructions). The amplicon library for high-throughput sequencing on the Illumina MiSeq platform was combined with an equal amount and subsequently quantified (KAPA Library Quantification Kit KK4824) according to the manufacturer's instructions.
